# Supplementary material
Source: PubMed Central journal article supplement (PMC2413327)
Supplement: NIHMS50473-supplement-suppl__figures.pdf [file NIHMS50473-supplement-suppl__figures.pdf]

Neuron, Volume 57

**Supplemental Data**

**Selective Disruption of One Cartesian Axis of  
Cortical Maps and Receptive Fields by Deficiency  
in Ephrin-As and Structured Activity**

Jianhua Cang, Cristopher M. Niell, Xiaorong Liu, Cory Pfeiffenberger,  
David A. Feldheim, and Michael P. Stryker

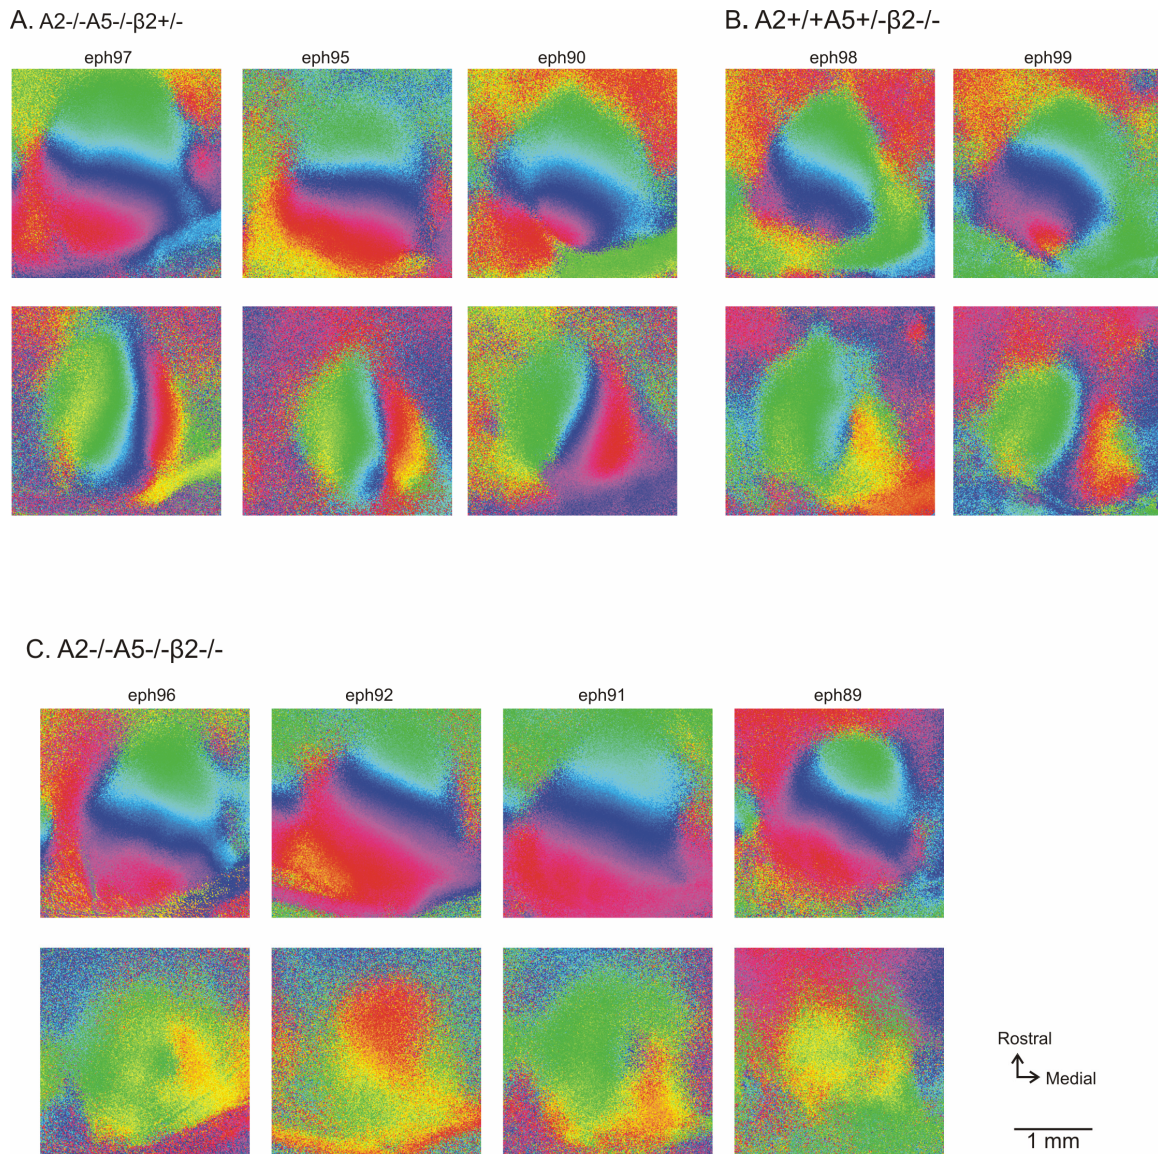

Supplemental Figure 1. Examples of cortical retinotopic maps in mice of different genotypes.

(A) Elevation (upper panel) and azimuth (lower panel) maps of three  $A2^{-/-}A5^{-/-}\beta2^{+/-}$  mice. The color code used to represent positions in the visual field is the same as in Fig. 1. The text “eph###” on top of each column is the ID of the animal from which the maps were obtained.

(B) Two examples of  $A2^{+/+}A5^{+/-}\beta2^{-/-}$  mice. (C) Four examples of the  $A2^{-/-}A5^{-/-}\beta2^{-/-}$  combination KOs.

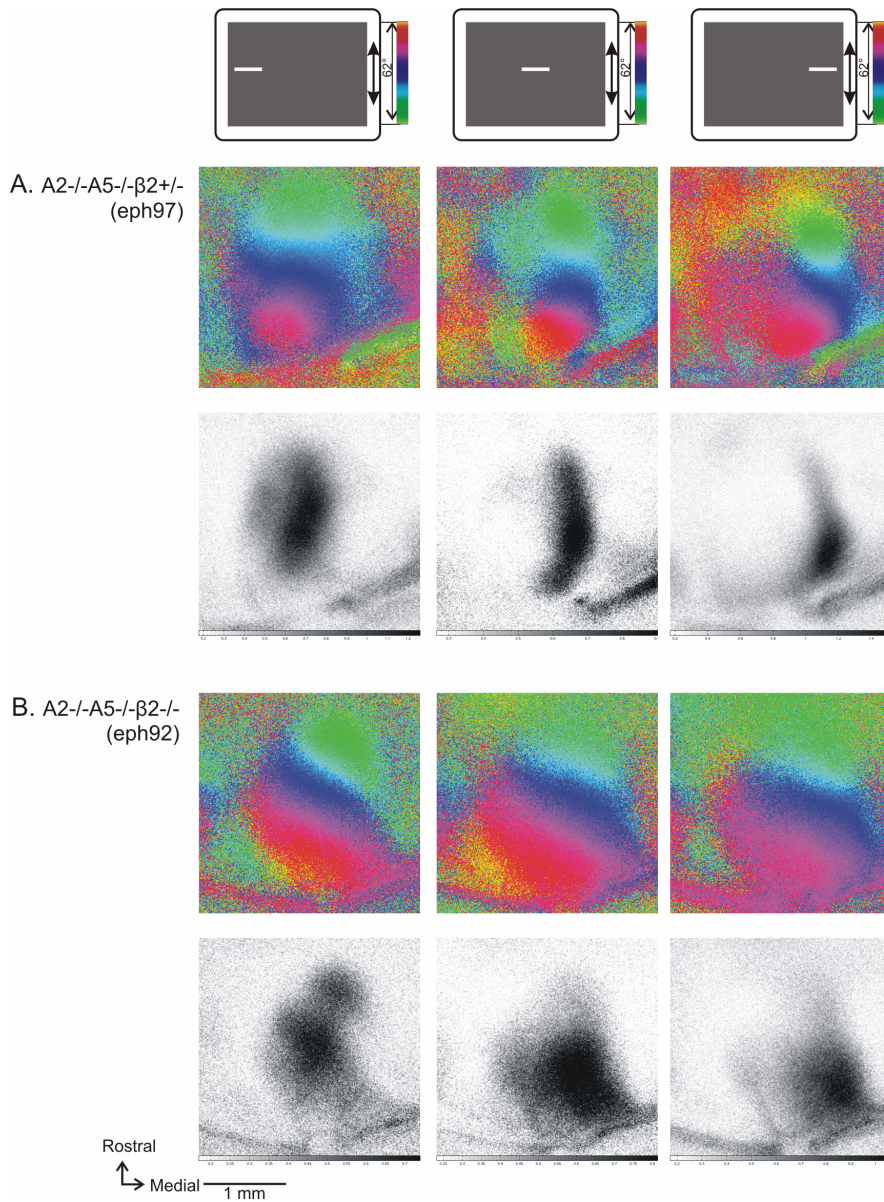

Supplemental Figure 2. Example maps obtained by spatially restricted stimuli.

(A) Phase (upper panel) and amplitude (lower panel) maps of an  $A2^{-/-}A5^{-/-}\beta2^{+/-}$  mouse in response to short bars drifting along different azimuth position (as diagramed in the top row).

(B) The same maps of an ephrin-A2A5- $\beta2$  combination KO.

A.  $A2^{-/-}A5^{-/-}\beta2^{+/-}$ , Hets

Eph97

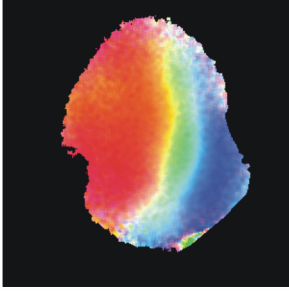

M016

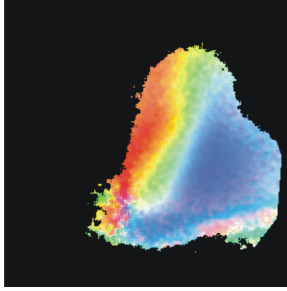

M019

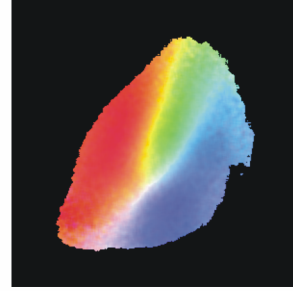

B.  $A2^{+/-}A5^{+/-}\beta2^{-/-}$ , Hets

Eph98

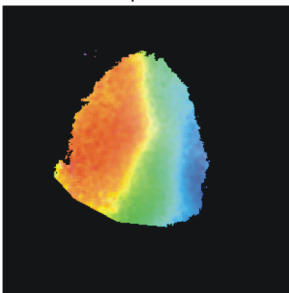

Eph99

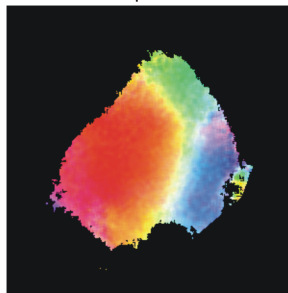

C.  $A2^{-/-}A5^{-/-}\beta2^{-/-}$ , combination Kos

Eph92

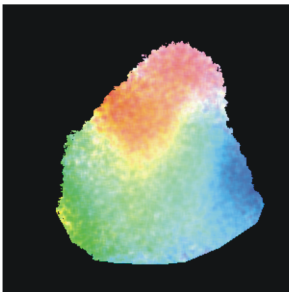

Eph96

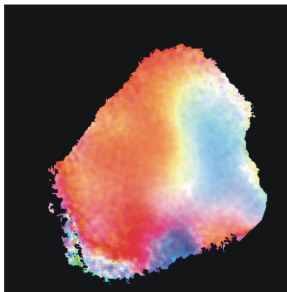

M017

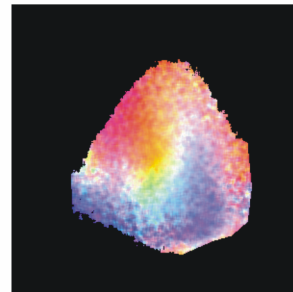

M018

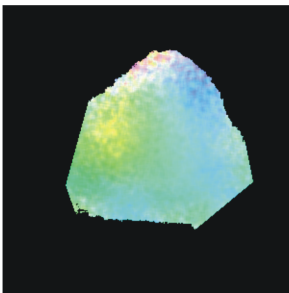

M027

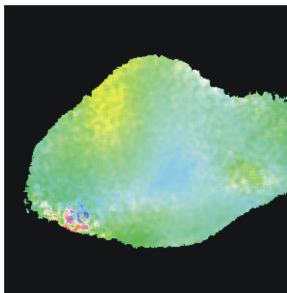

M038

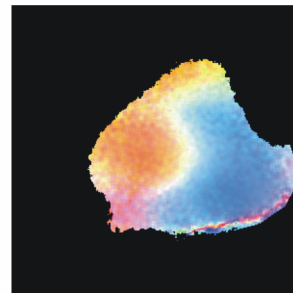

Supplemental Figure 3. Examples of maps obtained with short bar stimuli. All 6 cases studied with this technique in the combination KO animals are illustrated, along with representative cases from WT and heterozygous animals.
